# Supplementary material for: Cu2O/Cu2S microstructure regulation towards high efficiency photocatalytic hydrogen production and its theoretical mechanism analysis
Source: Royal Society of Chemistry journal article supplement (doi:10.1039/d3ce00628j), 2023-01-01
Supplement: d3ce00628j1.pdf [file d3ce00628j1.pdf]

## Supporting Information

### **Cu<sub>2</sub>O/Cu<sub>2</sub>S Microstructure Regulation Towards High Efficiency Photocatalytic Hydrogen Production And Its Theoretical Mechanism Analysis**

Fen Qiao<sup>a\*</sup>, Shen Qian<sup>a</sup>, Wenjie Liu<sup>a</sup>, Taihang Zhou<sup>a</sup>, Jing Yang<sup>a</sup>, Jikang Zhao<sup>a</sup>,  
Jiaren Yuan<sup>b\*</sup>

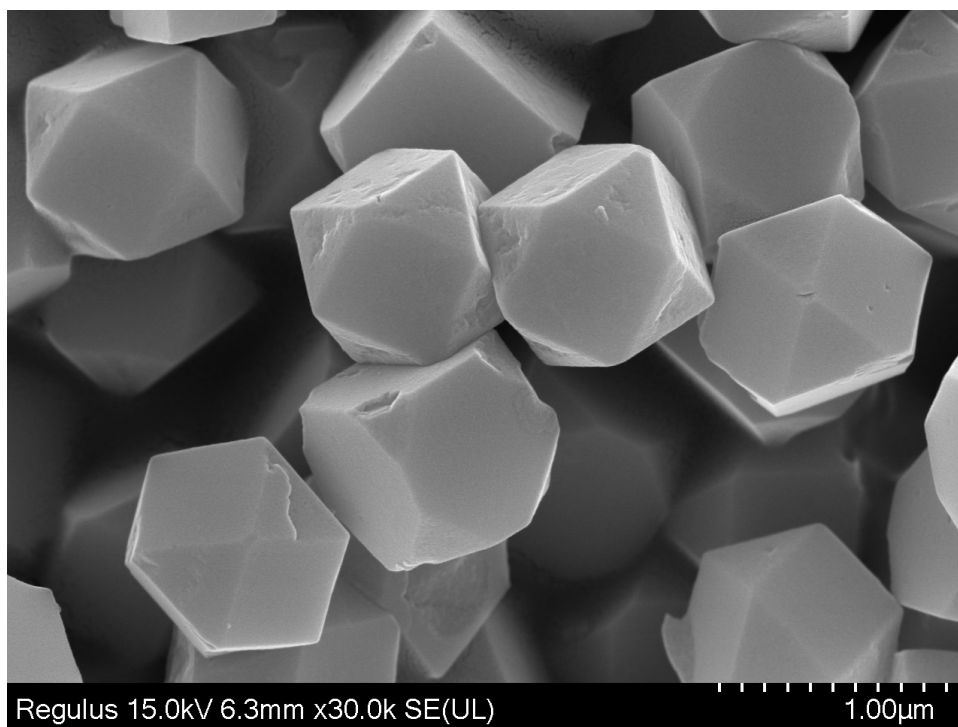

**Fig.S1 SEM image of Cu<sub>2</sub>O sample**

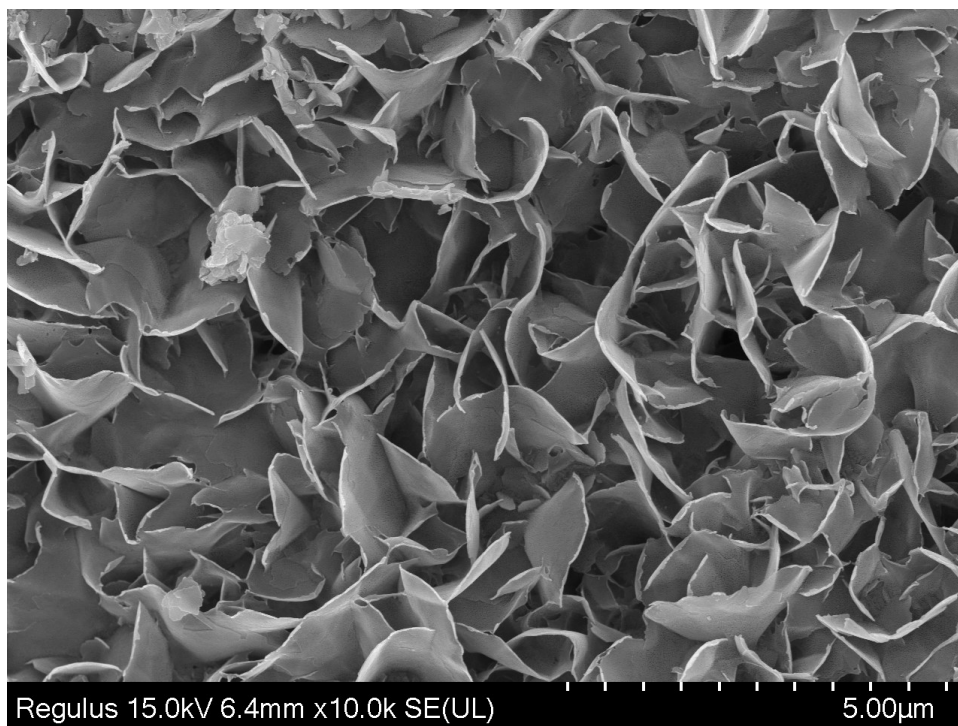

**Fig.S2 SEM image of  $\text{Cu}_2\text{O}/\text{Cu}_2\text{S}$ -1 sample**

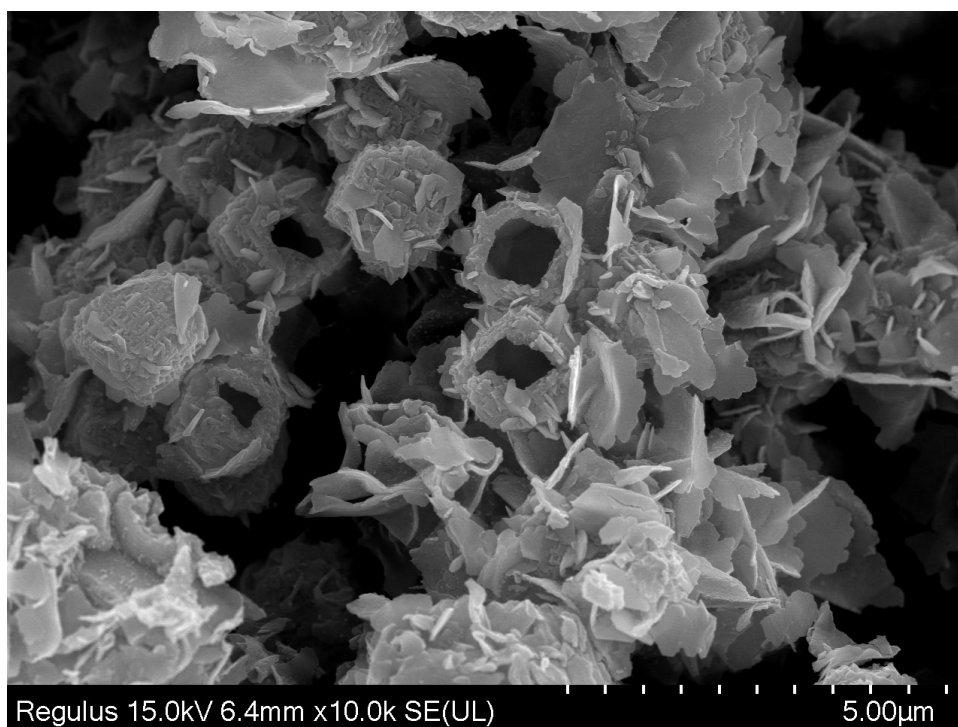

**Fig.S3 SEM image of  $\text{Cu}_2\text{O}/\text{Cu}_2\text{S}$ -2 sample**

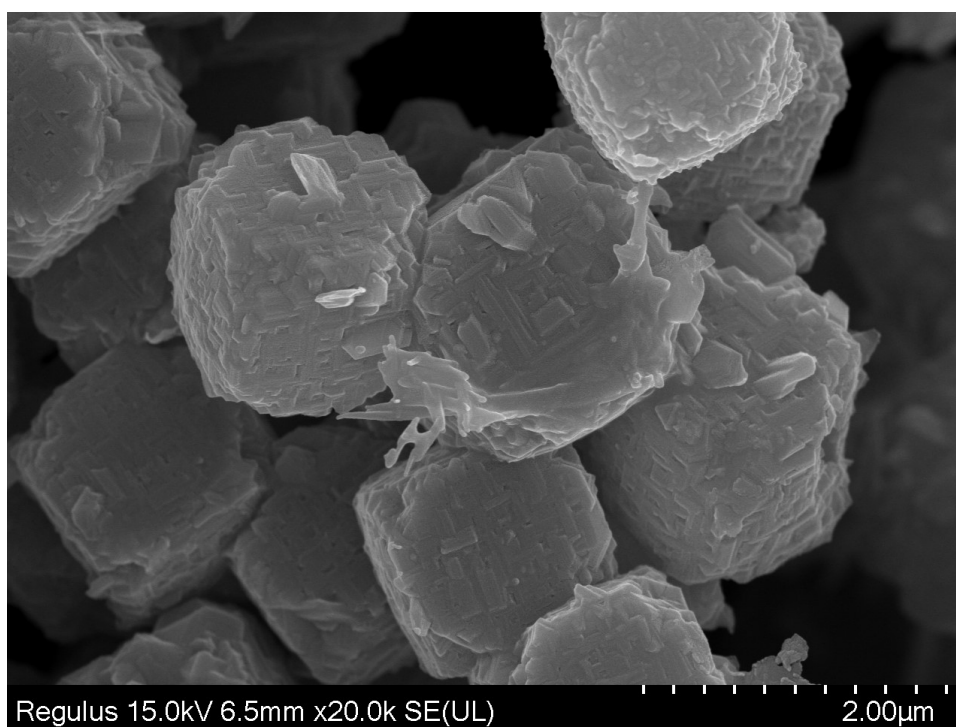

**Fig.S4 SEM image of Cu<sub>2</sub>O/Cu<sub>2</sub>S-3 sample**

All DFT computations were performed utilizing the Perdew-Burke-Ernzerhof (PBE) flavor of spin-polarized DFT with generalized gradient approximation (GGA), as integrated in the software of Vienna ab initio simulation program (VASP). To treat valence electrons, a plane waves basis set with a kinetic energy cutoff of 400 eV was adopted. The convergence criteria for energy and force were set at  $10^{-5}$  eV and 0.02 eV/Å, respectively. The k-point densities used for Brillouin zone sampling in electronic calculations were  $9 \times 9 \times 1$ . A Grimme of DFT-D3 method was adopted in all calculations. To avoid inaccuracies due by periodic effects, a 15 Å vacuum layer was placed along the z-axis of the plane to simulate the slab surface.
